# Supplementary material
Source: PubMed Central journal article supplement (PMC7269806)
Supplement: NIHMS1559400-supplement-2.pdf [file NIHMS1559400-supplement-2.pdf]

# Supplementary Table S1

**Table S1.**  $^{89}\text{Zr}$ -oxine labeled cell doses infused to rhesus macaques.

| <b>Cell types</b>            |            | <b>Body weight (kg)</b> | <b><math>^{89}\text{Zr}</math>-activity (kBq)</b> | <b>Cell number (<math>\times 10^6</math>)</b> | <b>kBq/kg</b> | <b><math>10^6</math> cells/kg</b> | <b>kBq/<math>10^6</math> cells</b> |
|------------------------------|------------|-------------------------|---------------------------------------------------|-----------------------------------------------|---------------|-----------------------------------|------------------------------------|
| Ex vivo expanded NK cells #1 |            | 5.7                     | 2331                                              | 140.0                                         | 408.9         | 22.8                              | 17.9                               |
| Ex vivo expanded NK cells #2 |            | 6.2                     | 1243                                              | 130.0                                         | 200.5         | 25.8                              | 7.8                                |
| Ex vivo expanded NK cells #3 |            | 7.8                     | 2590                                              | 170.0                                         | 334.2         | 21.9                              | 15.2                               |
|                              | mean       | 6.6                     | 2055                                              | 146.7                                         | 314.6         | 23.5                              | 13.6                               |
|                              | $\pm$ s.d. | $\pm 1.1$               | $\pm 715$                                         | $\pm 20.8$                                    | $\pm 106.0$   | $\pm 2.0$                         | $\pm 5.3$                          |
| Apoptotic NK cells           |            | 5.3                     | 276                                               | 18.4                                          | 52.0          | 3.5                               | 15.0                               |
| Non-expanded NK cells        |            | 6.8                     | 185                                               | 27.0                                          | 27.2          | 4.0                               | 6.9                                |
| HSPCs                        |            | 6.5                     | 355                                               | 8.0                                           | 54.6          | 1.2                               | 44.4                               |
| <b>All rhesus macaques</b>   | mean       | 6.4                     |                                                   |                                               |               |                                   |                                    |
|                              | $\pm$ s.d. | $\pm 0.9$               |                                                   |                                               |               |                                   |                                    |
